# Supplementary material for: Thyroid hormone stimulates hepatic lipid catabolism via activation of autophagy
Source: JCI journal article supplement (doi:10.1172/jci60580), 2012-06-11
Supplement: sd1 [file 1]

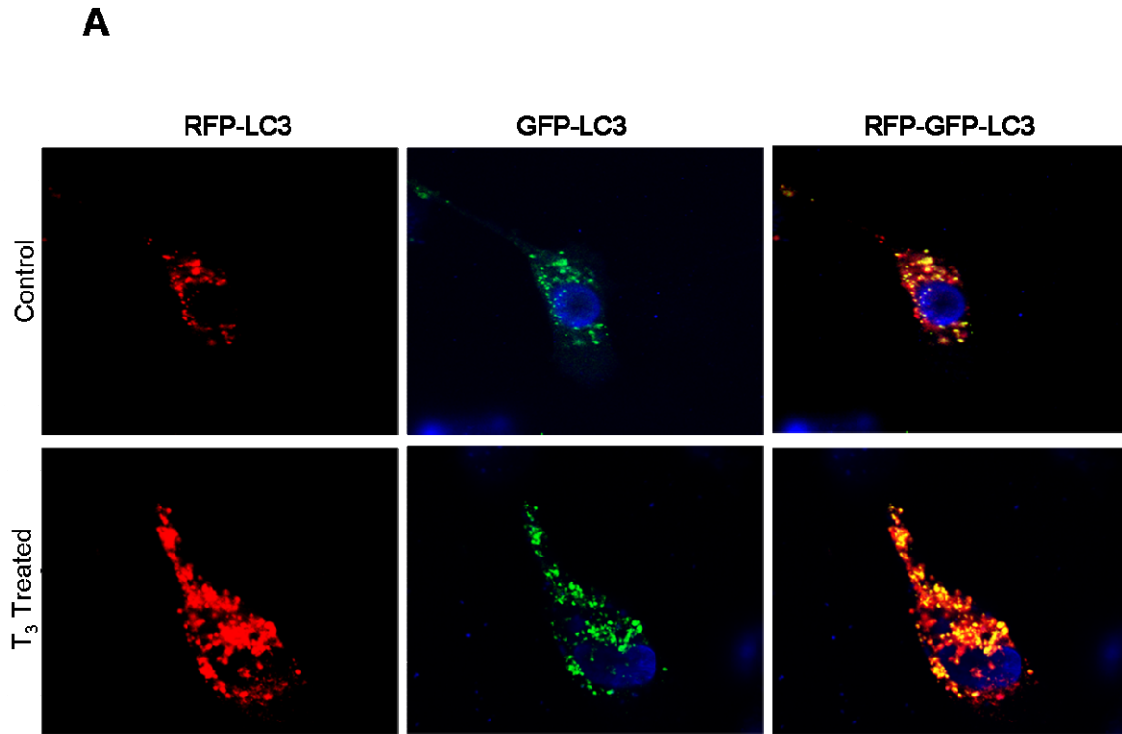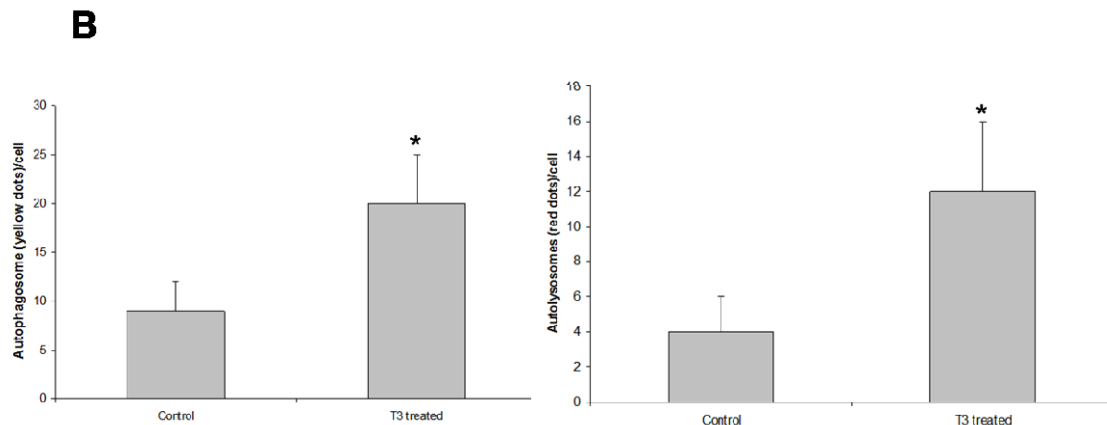

**Suppl. Figure 1. T<sub>3</sub> induces autophagic flux in hepatic cells.** (A) RFP-GFP-LC3 transfected HepG2/TR $\alpha$  cells were visualized and cells were quantified for RFP-LC3-puncta (red dots) representing both autolysosomes and autophagosomes (far left panels). GFP-LC3 (green dots) puncta denote autophagosomes (middle panels). When middle panels are overlaid with left panels, yellow dots represent autophagosomes and red dots are autolysosomes (far right panels) since acidification abolishes green fluorescence. (B) The number of autophagosomes (yellow dots) and autolysosomes (red dots) in the overlay (far right panels) were quantitated. Images were performed by confocal microscopy (40X magnification) after 48 hrs T<sub>3</sub> treatment. The p values for assessing the number of LC3-II-positive autophagosomes and autolysosomes using ImageJ were determined using Student's t-test (n=3; p<0.05).

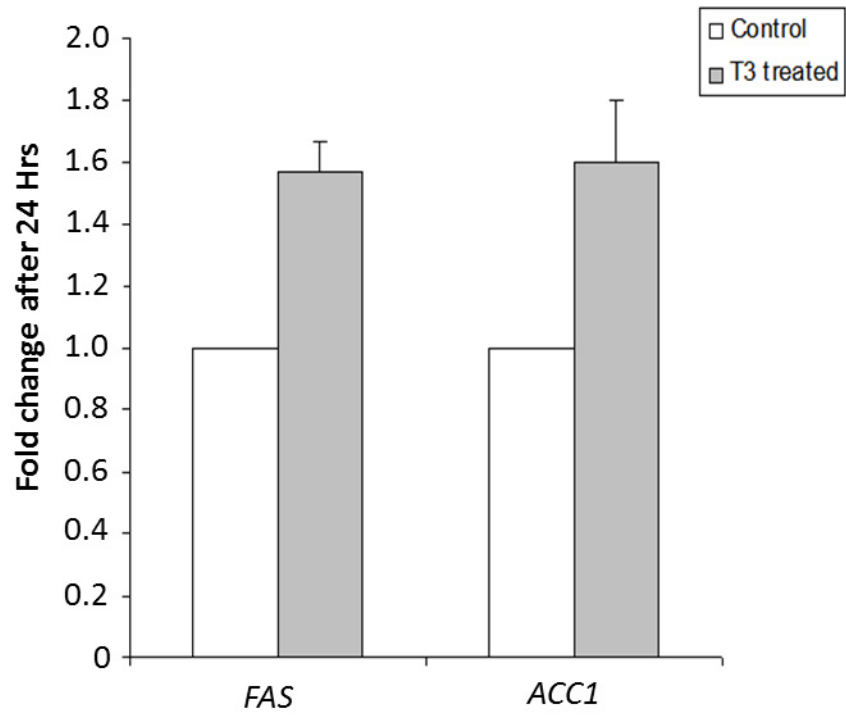

**Suppl. Figure 2.** Real-Time PCR analysis of *FAS* & *ACC1* mRNA in HepG2/TR $\alpha$  cells (\* $p < 0.05$ ,  $n = 3$ ).

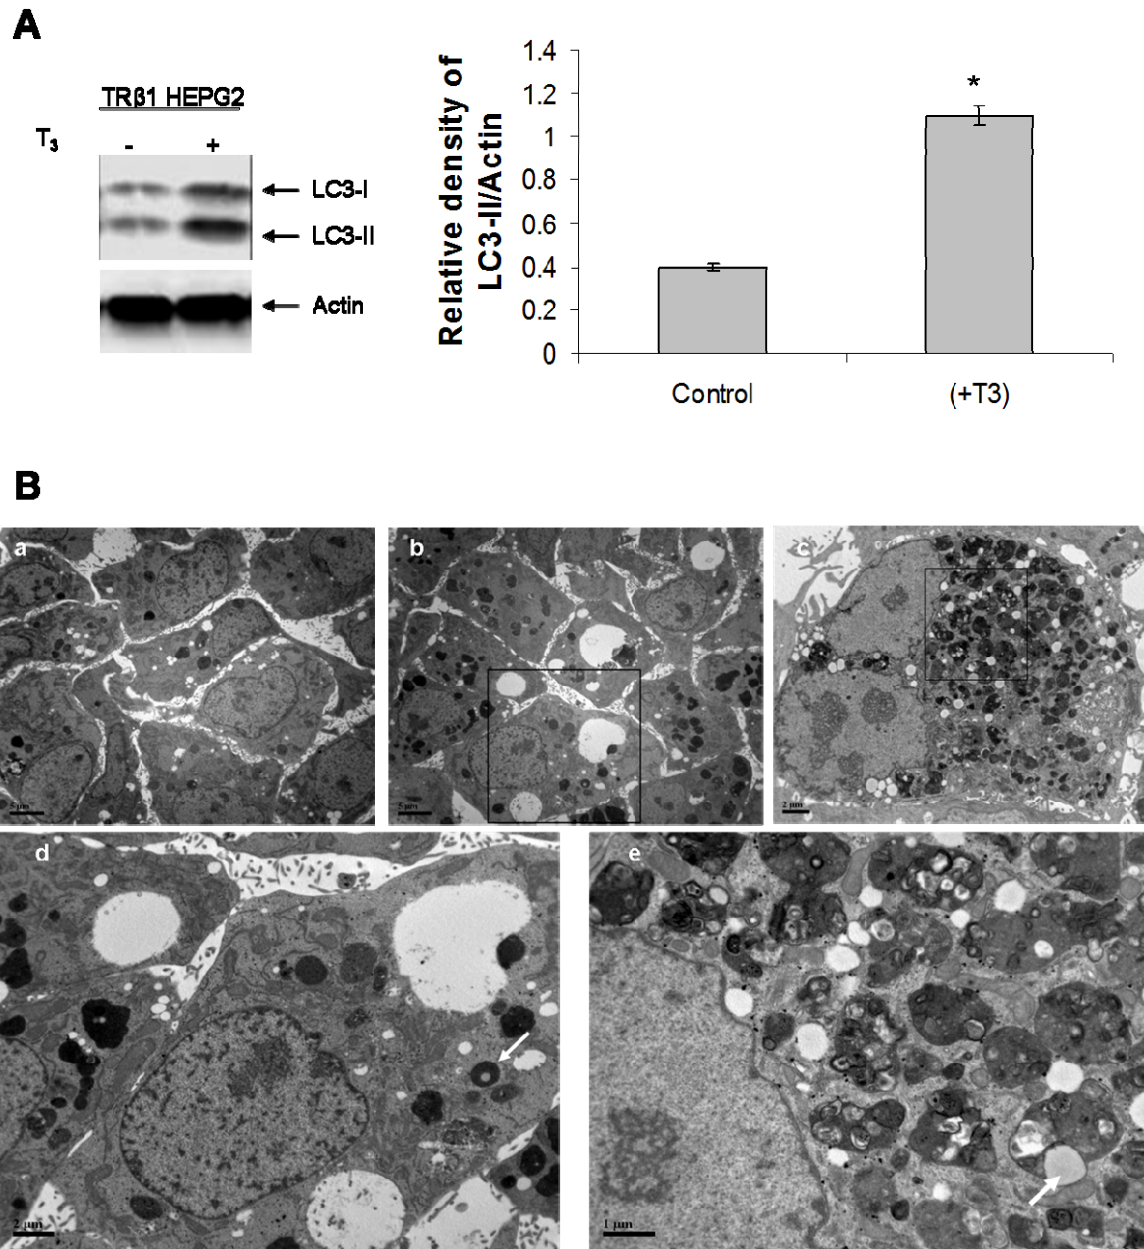

**Suppl. Figure 3. T<sub>3</sub> induces autophagy in HepG2/TR $\beta$  cells.** (A) Immunoblot and densitometric analysis of LC-3-II accumulation upon T<sub>3</sub> treatment in HepG2/TR $\beta$  cells (n=3, \*p<0.05). Electron micrographs and immunoblot of untreated control (B) and T<sub>3</sub>-treated (C-F) HepG2/TR $\beta$  cells show increased autophagy. Panel E and F are magnified images of boxed area in C and D respectively. White arrows in E & F indicate autolysosomes laden with lipid cargo. Scale Bars in (B,C) are 5 $\mu$ m, (D,E) are 2 $\mu$ m and in (F) is 1 $\mu$ m.

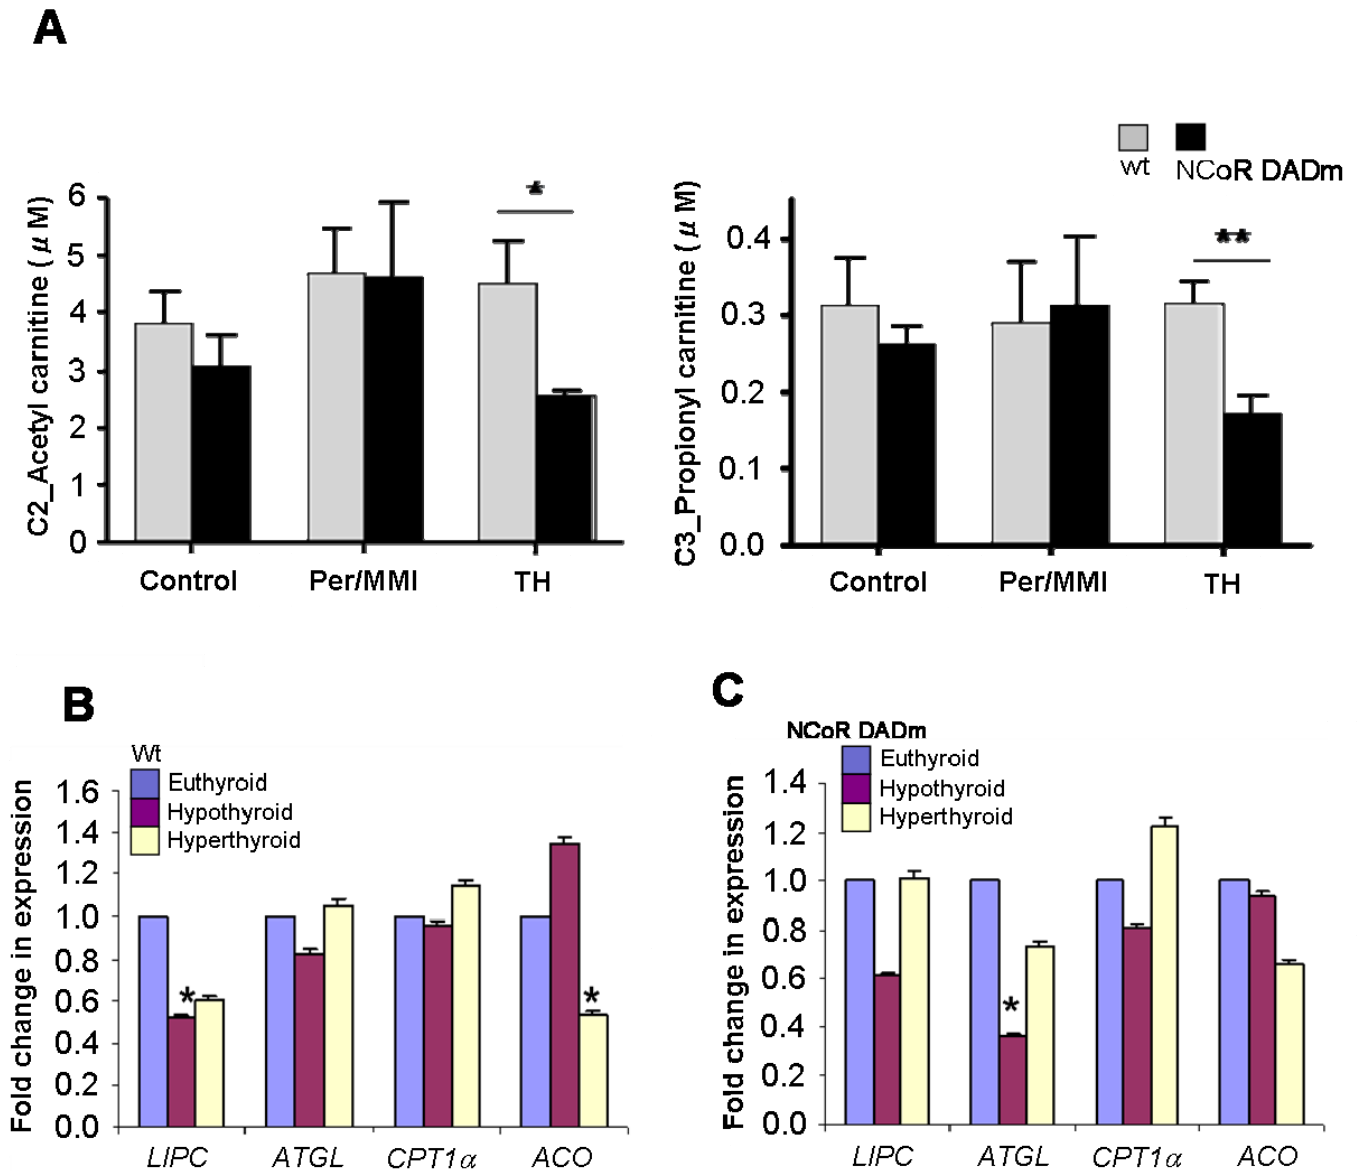

**Suppl. Figure 4. Metabolomic, and lipolytic target gene regulation of wt and NCoR DADm mice.**

(A) Metabolomic analysis of short chain acyl carnitines in wt and NCoR DADm mice. Fresh drinking water was provided daily containing 1% perchlorate and 0.05% methimazole for 2 wk (hypothyroid group). Fourteen hours before they were killed, all animals were given a sc injection of vehicle (0.9% saline in 100  $\mu$ l volume) for control and hypothyroid group or 40.0 $\mu$ g/100 g T<sub>4</sub> with 4.0 $\mu$ g/100 g T<sub>3</sub> for hyperthyroid group (\*p<0.05, n=5). Real-Time PCR analysis of *LIPC*, *ATGL*, *CPT-1 $\alpha$*  and *ACO* in (B) Wild-type (wt) and (C) NCoR DADm mice, (\*p<0.05, n=3).

**A**

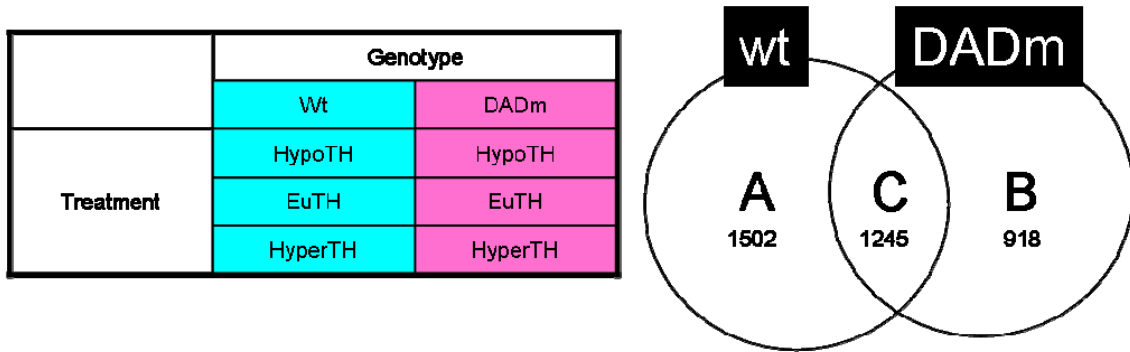

**A+C: gene changes by thyroid hormone in wt mouse (2747)**

**B+C: gene changes by thyroid hormone in DADm mouse (2163)**

**A: gene changes by thyroid hormone but ONLY in wt mouse(1502)**

**B: gene changes by thyroid hormone but ONLY in DADm mouse (918)**

**C: COMMON gene changes by thyroid hormone in BOTH wt AND DADm mouse (1245)**

**B**

**A: gene changes by thyroid hormone but ONLY in wt mouse(1502)**

oxidation reduction  
translation  
cofactor metabolic process  
coenzyme metabolic process  
nitrogen compound biosynthetic process  
organic acid catabolic process  
carboxylic acid catabolic process  
  
cofactor biosynthetic process  
hexose metabolic process  
monosaccharide metabolic process  
antigen processing and presentation of peptide  
antigen via MHC class I  
glycerolipid metabolic process  
cellular amino acid derivative metabolic  
process

**B: gene changes by thyroid hormone but ONLY in DADm mouse(918)**

generation of precursor metabolites and energy  
oxidative phosphorylation  
electron transport chain  
proton transport  
hydrogen transport  
ATP synthesis coupled proton transport  
energy coupled proton transport, down  
electrochemical gradient  
ion transmembrane transport  
oxidation reduction  
mitochondrion organization  
translation  
  
phosphorylation  
nucleoside triphosphate metabolic process

|                                                                                                                                                                                                                                                                                                                                                                                                                                                                                                                                                                                                                                                                                 |                                                                                                                                                                                                                                                                                                                                                                                                                                                                                                                                                                                                                                                                                                                                                                                  |
|---------------------------------------------------------------------------------------------------------------------------------------------------------------------------------------------------------------------------------------------------------------------------------------------------------------------------------------------------------------------------------------------------------------------------------------------------------------------------------------------------------------------------------------------------------------------------------------------------------------------------------------------------------------------------------|----------------------------------------------------------------------------------------------------------------------------------------------------------------------------------------------------------------------------------------------------------------------------------------------------------------------------------------------------------------------------------------------------------------------------------------------------------------------------------------------------------------------------------------------------------------------------------------------------------------------------------------------------------------------------------------------------------------------------------------------------------------------------------|
| amine catabolic process<br>phospholipid metabolic process<br>organophosphate metabolic process<br>coenzyme biosynthetic process<br><b>lipid catabolic process</b><br><br>alcohol catabolic process<br>cellular lipid catabolic process<br>glycerolipid biosynthetic process<br><br><b>fatty acid metabolic process</b><br><br>cellular response to reactive oxygen species<br>cellular carbohydrate catabolic process<br>biogenic amine metabolic process<br>acylglycerol metabolic process<br>cellular amino acid biosynthetic process<br><br>generation of precursor metabolites and energy<br>triglyceride metabolic process<br><b>cellular amino acid catabolic process</b> | purine nucleoside triphosphate metabolic process<br>nucleoside triphosphate biosynthetic process<br>phosphorus metabolic process<br>phosphate metabolic process<br>purine nucleoside triphosphate biosynthetic process<br>process<br>transmembrane transport<br>ATP biosynthetic process<br>nucleobase, nucleoside, nucleotide and nucleic acid biosynthetic process<br>nucleobase, nucleoside and nucleotide biosynthetic process<br>phosphoinositide metabolic process<br>ATP metabolic process<br>cellular macromolecule localization<br>ribonucleoside triphosphate biosynthetic process<br>purine ribonucleoside triphosphate biosynthetic process<br>process<br>mitochondrial transport<br><br>protein targeting to mitochondrion<br>protein localization in mitochondrion |
|---------------------------------------------------------------------------------------------------------------------------------------------------------------------------------------------------------------------------------------------------------------------------------------------------------------------------------------------------------------------------------------------------------------------------------------------------------------------------------------------------------------------------------------------------------------------------------------------------------------------------------------------------------------------------------|----------------------------------------------------------------------------------------------------------------------------------------------------------------------------------------------------------------------------------------------------------------------------------------------------------------------------------------------------------------------------------------------------------------------------------------------------------------------------------------------------------------------------------------------------------------------------------------------------------------------------------------------------------------------------------------------------------------------------------------------------------------------------------|

**Suppl. Figure 5. (A)** Scheme of animal groups used for microarray analysis. **(B)** Pathway analysis of differentially expressed genes in hyperthyroid wt and NCoR DADm (given 40.0µg/100 g T<sub>4</sub> with 4.0µg/100 g T<sub>3</sub> for 14 hrs before sacrifice) mice using DAVID Bioinformatics Resources 6.7. Note the lipid and amino acid catabolic process (red) showing up exclusively in wt mice.

Table 1: **Primer Sequences**

| <b>Human</b>              |                              |
|---------------------------|------------------------------|
| <i>FAS</i> (sense)        | 5'- ACAGGGACAACCTGGAGTTCT    |
| <i>FAS</i> (antisense)    | 5'- CTGTGGTCCCACCTTATGAGT    |
| <i>ACCI</i> (sense)       | 5'- GTTGCACAAAAGGATTCAG      |
| <i>ACCI</i> (antisense)   | 5'- CGCATTACCATGCTCCGCAC     |
| <i>Actin</i> (sense)      | 5'- GCACAGAGCCTCGCCTTTGCC    |
| <i>Actin</i> (antisense)  | 5'- CATGCCACCATCACGCCCTGG    |
| <b>Mouse</b>              |                              |
| <i>ACO</i> (sense)        | 5'- ATATTTACGTCACGTTTACCCCGG |
| <i>ACO</i> (antisense)    | 5'- GGCAGGTCATTCAAGTACGACAC  |
| <i>CPT-1a</i> (sense)     | 5'- CGCACGGAAGGAAAATGG       |
| <i>CPT-1a</i> (antisense) | 5'- TGTGCCCAATATTCCTGG       |
| <i>ATGL</i> (sense)       | 5'- AACACCAGCATCCAGTTCAA     |
| <i>ATGL</i> (antisense)   | 5'- GGTTCAGTAGGCCATTCCTC     |
| <i>LIPC</i> (sense)       | 5'- GACGGGAAGAACAAGATTGGAA   |
| <i>LIPC</i> (antisense)   | 5'- TTGGCATCAGGAGAAAGG       |
| <i>Actin</i> (sense)      | 5'- GCGAGCACAGCTTCTTTGCA     |
| <i>Actin</i> (antisense)  | 5'- ACGCAGCTCAGTAACAGTCC     |
